# Supplementary material for: Net Budgetary Impact of Ferric Citrate as a First-Line Phosphate Binder for the Treatment of Hyperphosphatemia: A Markov Microsimulation Model
Source: PubMed Central journal article supplement — Drugs R D. 2017 Jan 11;17(1):159–66. doi: 10.1007/s40268-016-0163-7 (PMC5318331; doi:10.1007/s40268-016-0163-7), 2017-01-11
Supplement: 40268_2016_163_MOESM1_ESM.pdf [file 40268_2016_163_MOESM1_ESM.pdf]

## SUPPLEMENTARY MATERIAL

**Journal:** Drugs in R&D

**Manuscript Title:** Net Budgetary Impact of Ferric Citrate as a First-Line Phosphate Binder for the Treatment of Hyperphosphatemia: A Markov Microsimulation Model

**Authors:** Steven M. Brunelli, MD, MSCE<sup>1</sup>; Scott P. Sibbel, PhD, MPH<sup>1</sup>; David Van Wyck, MD<sup>2</sup>; Amit Sharma, MD<sup>3</sup>; Andrew Hsieh, PharmD<sup>3</sup>; Glenn M. Chertow, MD<sup>4</sup>

**Corresponding author:**

Steven M. Brunelli, MD, MSCE

DaVita Clinical Research

[Steven.Brunelli@DaVita.com](mailto:Steven.Brunelli@DaVita.com)

**Table S1: Patient Characteristics**

|                                 | <b>N = 25,950</b> |
|---------------------------------|-------------------|
| <b>Age, years</b>               |                   |
| mean $\pm$ SD                   | 57.4 $\pm$ 14.3   |
| median [p25, p75]               | 58 [48, 68]       |
| <b>Gender, n (%)</b>            |                   |
| Male                            | 13,416 (51.7)     |
| Female                          | 12,534 (48.3)     |
| <b>Race, n (%)</b>              |                   |
| White                           | 6100 (23.5)       |
| Black                           | 11,925 (46.0)     |
| Hispanic                        | 6287 (24.2)       |
| Asian                           | 1638 (6.3)        |
| <b>Vascular access, n (%)</b>   |                   |
| Arteriovenous fistula           | 17,079 (65.8)     |
| Arteriovenous graft             | 2882 (11.1)       |
| Central venous catheter         | 5986 (23.1)       |
| <b>Dialysis vintage, months</b> |                   |
| mean $\pm$ SD                   | 53.4 $\pm$ 47.0   |
| median [p25, p75]               | 40 [20, 72]       |

**Table S2: Transition Matrix: Change in Binder Strength by Starting Binder Strength and Starting Serum Phosphorus Concentration**

| n (%)                               | Starting Binder Strength |                       |                       |                     |                     |
|-------------------------------------|--------------------------|-----------------------|-----------------------|---------------------|---------------------|
|                                     | 0                        | 1/1.5                 | 2/2.5                 | 3/3.5               | 4+                  |
| <b>Starting Phos &lt; 3.5 mg/dL</b> |                          |                       |                       |                     |                     |
| Δ Strength -2.0                     | -                        | -                     | 2384 (25.6)           | 127 (23.5)          | 65 (33.7)           |
| Δ Strength -1.5                     | -                        | 1099 (13.4)           | 25 (0.3)              | 65 (12.0)           | 1 (0.5)             |
| Δ Strength -1.0                     | -                        | 777 (9.5)             | 89 (1.0)              | 27 (5.0)            | 2 (1.0)             |
| Δ Strength -0.5                     | -                        | 49 (0.6)              | 62 (0.7)              | 3 (0.6)             | 1 (0.5)             |
| Δ Strength 0.0                      | 9402 (79.1)              | 6054 (73.8)           | 6656 (71.6)           | 309 (57.2)          | 124 (64.3)          |
| Δ Strength +0.5                     | -                        | 91 (1.1)              | 4 (0.0)               | 6 (1.1)             | -                   |
| Δ Strength +1.0                     | 417 (3.5)                | 71 (0.9)              | 28 (0.3)              | 1 (0.2)             | -                   |
| Δ Strength +1.5                     | 602 (5.1)                | 29 (0.4)              | 19 (0.2)              | -                   | -                   |
| Δ Strength +2.0                     | 1465 (12.3)              | 36 (0.4)              | 32 (0.3)              | 2 (0.4)             | -                   |
| <b>Total</b>                        | <b>11,886 (100.0)</b>    | <b>8206 (100.0)</b>   | <b>9299 (100.0)</b>   | <b>540 (100.0)</b>  | <b>193 (100.0)</b>  |
| <b>Starting Phos 3.5-5.5 mg/dL</b>  |                          |                       |                       |                     |                     |
| Δ Strength -2.0                     | -                        | -                     | 15,502 (26.1)         | 735 (23.1)          | 535 (44.1)          |
| Δ Strength -1.5                     | -                        | 5419 (12.9)           | 82 (0.1)              | 319 (10.0)          | 9 (0.7)             |
| Δ Strength -1.0                     | -                        | 3712 (8.8)            | 389 (0.7)             | 207 (6.5)           | 8 (0.7)             |
| Δ Strength -0.5                     | -                        | 167 (0.4)             | 265 (0.5)             | 15 (0.5)            | 7 (0.6)             |
| Δ Strength 0.0                      | 51,495 (76.8)            | 31,141 (74.0)         | 42,538 (71.6)         | 1855 (58.3)         | 651 (53.7)          |
| Δ Strength +0.5                     | -                        | 674 (1.6)             | 22 (0.0)              | 28 (0.9)            | 1 (0.1)             |
| Δ Strength +1.0                     | 2210 (3.3)               | 498 (1.2)             | 142 (0.24)            | 14 (0.4)            | 1 (0.1)             |
| Δ Strength +1.5                     | 3334 (5.0)               | 185 (0.4)             | 148 (0.3)             | 6 (0.2)             | -                   |
| Δ Strength +2.0                     | 9984 (14.9)              | 306 (0.7)             | 297 (0.5)             | 2 (0.1)             | -                   |
| <b>Total</b>                        | <b>67,023 (100.0)</b>    | <b>42,102 (100.0)</b> | <b>59,385 (100.0)</b> | <b>3181 (100.0)</b> | <b>1212 (100.0)</b> |
| <b>Starting Phos 5.6-6.5 mg/dL</b>  |                          |                       |                       |                     |                     |
| Δ Strength -2.0                     | -                        | -                     | 3971 (25.7)           | 279 (24.7)          | 201 (42.8)          |
| Δ Strength -1.5                     | -                        | 1047 (13.1)           | 33 (0.2)              | 104 (9.2)           | 3 (0.6)             |
| Δ Strength -1.0                     | -                        | 680 (8.5)             | 106 (0.7)             | 82 (7.2)            | 6 (1.3)             |
| Δ Strength -0.5                     | -                        | 27 (0.3)              | 67 (0.4)              | 7 (0.6)             | 4 (0.9)             |
| Δ Strength 0.0                      | 13,155 (77.6)            | 5570 (69.5)           | 11,011 (71.1)         | 643 (56.8)          | 255 (54.3)          |
| Δ Strength +0.5                     | -                        | 294 (3.7)             | 10 (0.1)              | 7 (0.6)             | 1 (0.2)             |
| Δ Strength +1.0                     | 440 (2.6)                | 182 (2.3)             | 105 (0.7)             | 7 (0.6)             | -                   |
| Δ Strength +1.5                     | 670 (4.0)                | 59 (0.7)              | 65 (0.4)              | 3 (0.3)             | -                   |
| Δ Strength +2.0                     | 2686 (15.9)              | 1621 (2.0)            | 112 (0.7)             | -                   | -                   |
| <b>Total</b>                        | <b>16,951 (100.0)</b>    | <b>8020 (100.0)</b>   | <b>15,480 (100.0)</b> | <b>1132 (100.0)</b> | <b>470 (100.0)</b>  |
| <b>Starting Phos ≥ 6.5 mg/dL</b>    |                          |                       |                       |                     |                     |
| Δ Strength -2.0                     | -                        | -                     | 4773 (24.8)           | 406 (22.2)          | 344 (43.8)          |
| Δ Strength -1.5                     | -                        | 1024 (12.8)           | 31 (0.2)              | 125 (6.8)           | 4 (0.5)             |
| Δ Strength -1.0                     | -                        | 704 (8.8)             | 152 (0.8)             | 137 (7.5)           | 13 (1.7)            |
| Δ Strength -0.5                     | -                        | 34 (0.4)              | 115 (0.6)             | 7 (0.4)             | 7 (0.9)             |
| Δ Strength 0.0                      | 16,256 (79.4)            | 5377 (67.2)           | 13,637 (70.9)         | 1098 (60.0)         | -                   |
| Δ Strength +0.5                     | -                        | 292 (3.7)             | 18 (0.1)              | 29 (1.6)            | 3 (0.4)             |
| Δ Strength +1.0                     | 411 (2.0)                | 241 (3.0)             | 167 (0.9)             | 18 (1.0)            | 1 (0.1)             |
| Δ Strength +1.5                     | 613 (3.0)                | 90 (1.1)              | 142 (0.7)             | 5 (0.3)             | -                   |
| Δ Strength +2.0                     | 3188 (15.6)              | 237 (3.0)             | 206 (1.1)             | 5 (0.3)             | -                   |
| <b>Total</b>                        | <b>20,468 (100.0)</b>    | <b>7999 (100.0)</b>   | <b>19,241 (100.0)</b> | <b>1830 (100.0)</b> | <b>786 (100.0)</b>  |

**Table S3: Transition Matrix: Probability of Death by Ending Binder Strength and Starting Serum Phosphorus Concentration**

|                             | Ending Binder Strength |              |              |              |              | Overall      |
|-----------------------------|------------------------|--------------|--------------|--------------|--------------|--------------|
|                             | 0                      | 1/1.5        | 2/2.5        | 3/3.5        | 4+           |              |
| Starting Phos < 3.5 mg/dL   | 0.007                  | 0.002        | 0.002        | 0.002        | 0.005        | <b>0.004</b> |
| Starting Phos 3.5-5.5 mg/dL | 0.004                  | 0.002        | 0.002        | 0.003        | 0.002        | <b>0.003</b> |
| Starting Phos 5.6-6.5 mg/dL | 0.006                  | 0.004        | 0.003        | 0.001        | 0.000        | <b>0.004</b> |
| Starting Phos ≥ 6.5 mg/dL   | 0.007                  | 0.004        | 0.004        | 0.004        | 0.002        | <b>0.005</b> |
| <b>Overall</b>              | <b>0.005</b>           | <b>0.002</b> | <b>0.002</b> | <b>0.003</b> | <b>0.002</b> | <b>0.003</b> |

**Table S4: Input Variable Distributions**

| <b>Variable</b>                                                                         | <b>Distribution</b>       |
|-----------------------------------------------------------------------------------------|---------------------------|
| Baseline serum phosphorus                                                               | $N(5.45, 1.64^2)$         |
| Change in serum phosphorus (patients with serum phos <3.5, binder strength = 0)         | $N(0.978, 1.23^2)$        |
| Change in serum phosphorus (patients with serum phos <3.5, binder strength = 1)         | $N(0.88, 1.13^2)$         |
| Change in serum phosphorus (patients with serum phos <3.5, binder strength = 2)         | $N(0.992, 1.24^2)$        |
| Change in serum phosphorus (patients with serum phos <3.5, binder strength = 3)         | $N(1.05, 1.26^2)$         |
| Change in serum phosphorus (patients with serum phos <3.5, binder strength = 4)         | $N(1.40, 1.73^2)$         |
| Change in serum phosphorus (patients with serum phos 3.5 to 5.5, binder strength = 0)   | $N(0.23, 1.13^2)$         |
| Change in serum phosphorus (patients with serum phos 3.5 to 5.5, binder strength = 1)   | $N(0.11, 1.06^2)$         |
| Change in serum phosphorus (patients with serum phos 3.5 to 5.5, binder strength = 2)   | $N(0.23, 1.14^2)$         |
| Change in serum phosphorus (patients with serum phos 3.5 to 5.5, binder strength = 3)   | $N(0.34, 1.29^2)$         |
| Change in serum phosphorus (patients with serum phos 3.5 to 5.5, binder strength = 4)   | $N(0.39, 1.31^2)$         |
| Change in serum phosphorus (patients with serum phos >5.5 to ≤6.5, binder strength = 0) | $N(-0.34, 1.36^2)$        |
| Change in serum phosphorus (patients with serum phos >5.5 to ≤6.5, binder strength = 1) | $N(-0.54, 1.35^2)$        |
| Change in serum phosphorus (patients with serum phos >5.5 to ≤6.5, binder strength = 2) | $N(-0.37, 1.35^2)$        |
| Change in serum phosphorus (patients with serum phos >5.5 to ≤6.5, binder strength = 3) | $N(-0.31, 1.42^2)$        |
| Change in serum phosphorus (patients with serum phos >5.5 to ≤6.5, binder strength = 4) | $N(-0.10, 1.44^2)$        |
| Change in serum phosphorus (patients with serum phos >6.5, binder strength = 0)         | $N(-1.08, 1.78^2)$        |
| Change in serum phosphorus (patients with serum phos >6.5, binder strength = 1)         | $N(-1.25, 1.76^2)$        |
| Change in serum phosphorus (patients with serum phos >6.5, binder strength = 2)         | $N(-1.14, 1.77^2)$        |
| Change in serum phosphorus (patients with serum phos >6.5, binder strength = 3)         | $N(-1.09, 1.92^2)$        |
| Change in serum phosphorus (patients with serum phos >6.5, binder strength = 4)         | $N(-1.07, 1.96^2)$        |
| ESA dose (patients with serum phos <3.5, binder strength = 0)                           | $\exp\{N(10.4, 0.98^2)\}$ |
| ESA dose (patients with serum phos <3.5, binder strength = 1)                           | $\exp\{N(10.3, 0.96^2)\}$ |
| ESA dose (patients with serum phos <3.5, binder strength = 2)                           | $\exp\{N(10.4, 0.97^2)\}$ |
| ESA dose (patients with serum phos <3.5, binder strength = 3)                           | $\exp\{N(10.4, 0.96^2)\}$ |
| ESA dose (patients with serum phos <3.5, binder strength = 4)                           | $\exp\{N(10.5, 0.90^2)\}$ |
| ESA dose (patients with serum phos 3.5 to 5.5, binder strength = 0)                     | $\exp\{N(10.3, 0.95^2)\}$ |
| ESA dose (patients with serum phos 3.5 to 5.5, binder strength = 1)                     | $\exp\{N(10.2, 0.93^2)\}$ |
| ESA dose (patients with serum phos 3.5 to 5.5, binder strength = 2)                     | $\exp\{N(10.3, 0.95^2)\}$ |
| ESA dose (patients with serum phos 3.5 to 5.5, binder strength = 3)                     | $\exp\{N(10.3, 0.93^2)\}$ |
| ESA dose (patients with serum phos 3.5 to 5.5, binder strength = 4)                     | $\exp\{N(10.5, 0.96^2)\}$ |
| ESA dose (patients with serum phos >5.5 to ≤6.5, binder strength = 0)                   | $\exp\{N(10.3, 0.95^2)\}$ |
| ESA dose (patients with serum phos >5.5 to ≤6.5, binder strength = 1)                   | $\exp\{N(10.3, 0.95^2)\}$ |
| ESA dose (patients with serum phos >5.5 to ≤6.5, binder strength = 2)                   | $\exp\{N(10.3, 0.96^2)\}$ |
| ESA dose (patients with serum phos >5.5 to ≤6.5, binder strength = 3)                   | $\exp\{N(10.4, 0.97^2)\}$ |
| ESA dose (patients with serum phos >5.5 to ≤6.5, binder strength = 4)                   | $\exp\{N(10.5, 0.97^2)\}$ |
| ESA dose (patients with serum phos >6.5, binder strength = 0)                           | $\exp\{N(10.4, 0.97^2)\}$ |
| ESA dose (patients with serum phos >6.5, binder strength = 1)                           | $\exp\{N(10.4, 0.96^2)\}$ |
| ESA dose (patients with serum phos >6.5, binder strength = 2)                           | $\exp\{N(10.4, 0.98^2)\}$ |
| ESA dose (patients with serum phos >6.5, binder strength = 3)                           | $\exp\{N(10.4, 0.94^2)\}$ |
| ESA dose (patients with serum phos >6.5, binder strength = 4)                           | $\exp\{N(10.6, 0.98^2)\}$ |
| Iron dose (patients with serum phos <3.5, binder strength = 0)                          | $\exp\{N(5.21, 0.58^2)\}$ |
| Iron dose (patients with serum phos <3.5, binder strength = 1)                          | $\exp\{N(5.22, 0.58^2)\}$ |
| Iron dose (patients with serum phos <3.5, binder strength = 2)                          | $\exp\{N(5.21, 0.57^2)\}$ |
| Iron dose (patients with serum phos <3.5, binder strength = 3)                          | $\exp\{N(5.24, 0.61^2)\}$ |
| Iron dose (patients with serum phos <3.5, binder strength = 4)                          | $\exp\{N(5.25, 0.57^2)\}$ |
| Iron dose (patients with serum phos 3.5 to 5.5, binder strength = 0)                    | $\exp\{N(5.21, 0.56^2)\}$ |
| Iron dose (patients with serum phos 3.5 to 5.5, binder strength = 1)                    | $\exp\{N(5.22, 0.55^2)\}$ |
| Iron dose (patients with serum phos 3.5 to 5.5, binder strength = 2)                    | $\exp\{N(5.22, 0.55^2)\}$ |
| Iron dose (patients with serum phos 3.5 to 5.5, binder strength = 3)                    | $\exp\{N(5.19, 0.55^2)\}$ |
| Iron dose (patients with serum phos 3.5 to 5.5, binder strength = 4)                    | $\exp\{N(5.24, 0.55^2)\}$ |
| Iron dose (patients with serum phos >5.5 to ≤6.5, binder strength = 0)                  | $\exp\{N(5.23, 0.56^2)\}$ |
| Iron dose (patients with serum phos >5.5 to ≤6.5, binder strength = 1)                  | $\exp\{N(5.22, 0.56^2)\}$ |

| Variable                                                               | Distribution              |
|------------------------------------------------------------------------|---------------------------|
| Iron dose (patients with serum phos >5.5 to ≤6.5, binder strength = 2) | $\exp\{N(5.24, 0.55^2)\}$ |
| Iron dose (patients with serum phos >5.5 to ≤6.5, binder strength = 3) | $\exp\{N(5.23, 0.55^2)\}$ |
| Iron dose (patients with serum phos >5.5 to ≤6.5, binder strength = 4) | $\exp\{N(5.18, 0.55^2)\}$ |
| Iron dose (patients with serum phos >6.5, binder strength = 0)         | $\exp\{N(5.22, 0.57^2)\}$ |
| Iron dose (patients with serum phos >6.5, binder strength = 1)         | $\exp\{N(5.23, 0.56^2)\}$ |
| Iron dose (patients with serum phos >6.5, binder strength = 2)         | $\exp\{N(5.24, 0.58^2)\}$ |
| Iron dose (patients with serum phos >6.5, binder strength = 3)         | $\exp\{N(5.25, 0.57^2)\}$ |
| Iron dose (patients with serum phos >6.5, binder strength = 4)         | $\exp\{N(5.24, 0.55^2)\}$ |
